# Supplementary material for: Exploring Peptaibol’s Profile, Antifungal, and Antitumor Activity of Emericellipsin A of Emericellopsis Species from Soda and Saline Soils
Source: MDPI journal article supplement (doi:10.3390/molecules27051736), 2022-03-07
Supplement: s1 [file s1]

# Supplementary

**Table S1. List of isolates used in this study**

| Species                                                 | No. of Strains,<br>No. of VKM, VKPM,<br>CBS Collections | GenBank<br>accessions |
|---------------------------------------------------------|---------------------------------------------------------|-----------------------|
| <i>Emericellopsis alkalina</i> Bilanenko & Georgieva    | E101, F-4108, CBS 127350 T                              | KC987171              |
|                                                         | A118, VKPM F1428                                        | KC987155              |
|                                                         | M20, FW-3040, CBS 120044                                | KC987169              |
|                                                         | A103                                                    | KC987140              |
|                                                         | A112                                                    | KC987149              |
|                                                         | A113, FW-1476                                           | KC987150              |
|                                                         | A114, FW-1473                                           | KC987151              |
|                                                         | A115, FW-1474                                           | KC987152              |
|                                                         | A116                                                    | KC987153              |
|                                                         | A117, FW-1471                                           | KC987154              |
|                                                         | A119                                                    | KC987156              |
|                                                         | A120                                                    | KC987157              |
|                                                         | A121                                                    | KC987158              |
|                                                         | A122                                                    | KC987159              |
|                                                         | A123                                                    | KC987160              |
|                                                         | A124                                                    | KC987161              |
|                                                         | A125                                                    | KC987162              |
|                                                         | A126                                                    | KC987163              |
|                                                         | A127                                                    | KC987164              |
|                                                         | A128                                                    | KC987165              |
|                                                         | M14, F-3905, CBS 120043                                 | KC987168              |
|                                                         | M71, F-3907, CBS 120049                                 | KC987170              |
|                                                         | 6KS10-2, SLF 0110.0602                                  | OM489386              |
|                                                         | 3KS17-13, SLF 0117.0313                                 | OM489387              |
|                                                         | 5KS17-3, SLF 0117.0503                                  | OM489388              |
|                                                         | 9KS17-3, SLF 0117.0903                                  | OM489389              |
|                                                         | 6KS17-1, SLF 0117.0601                                  | OM489390              |
|                                                         | 7KS17-1, SLF 0117.0701                                  | OM489391              |
|                                                         | 8KS17-1, SLF 0117.0801                                  | OM489392              |
|                                                         | 10KS17-1, SLF 0117.1001                                 | OM489393              |
|                                                         | 14KS17-1, SLF 0117.1401                                 | OM489394              |
|                                                         | 1KS18-5, SLF 0118.0105                                  | OM489395              |
| <i>Emericellopsis</i> cf. <i>maritima</i> Beliakova     | 1KS17-1, SLF 0117.0101                                  | OM489381              |
|                                                         | 3KS17-1, SLF 0117.0301                                  | OM489384              |
| <i>Emericellopsis</i> cf. <i>terricola</i> J.F.H. Beyma | 1KS17-4, SLF 0117.0104                                  | OM489382              |
| <i>Emericellopsis</i> sp.                               | 2KS17-1, SLF 0117.0201                                  | OM489383              |
| <i>Emericellopsis</i> sp.                               | 3KS17-2, SLF 0117.0302                                  | OM489385              |
| <i>Emericellopsis</i> sp.                               | 3KS17-12, SLF 0117.0312                                 | OM489380              |

**Table S2. Sequences retrieved from GenBank [50] for phylogenetic analysis**

| Species                                                                 | Acession number       | GenBank acessions |
|-------------------------------------------------------------------------|-----------------------|-------------------|
| <i>Emericellopsis atlantica</i> L.W. Hou, Crous, Rämä & Hagestad        | TS7 / CBS 147198T     | OL539742.1        |
| <i>Emericellopsis cladophorae</i> M. Gonçalves, T. Vicente & A. Alves   | MUM 19.33 /<br>CMG25T | MK986711          |
| <i>Emericellopsis donezkii</i> Beliakova                                | CBS 489.71T           | NR_156195.1       |
| <i>Emericellopsis enteromorphae</i> M. Gonçalves, T. Vicente & A. Alves | MUM 19.34 /<br>CMG26T | MK986712          |
| <i>Emericellopsis glabra</i> (J.F.H. Beyma) Backus & Orpurt             | CBS 119.40T           | NR_145024.1       |
| <i>Emericellopsis humicola</i> (Cain) Cain ex Grosklags & Swift         | CBS 180.56T           | NR_145025.1       |
| <i>Emericellopsis koreana</i> Hyang B. Lee, S.J. Jeon & T.T.T. Nguyen   | CNUFC-MOG1-1T         | MH173304          |
| <i>Emericellopsis maritima</i> Beliakova                                | CBS 491.71T           | KC987175          |
| <i>Emericellopsis microspora</i> Backus & Orpurt                        | CBS 380.62T           | NR_156196.1       |
| <i>Emericellopsis minima</i> Stolk                                      | CBS 190.55T           | KC987173          |
| <i>Emericellopsis mirabilis</i> (Malan) Stolk                           | CBS 177.53T           | AY632656          |
| <i>Emericellopsis pallida</i> Beliakova                                 | CBS 490.71T           | KC987176          |
| <i>Emericellopsis persica</i> Papizadeh, Wijayaw., Soudi & K.D. Hyde    | IBRC-M 30046T         | KX668543          |
| <i>Emericellopsis phycophila</i> M. Gonçalves, T. Vicente & A. Alves    | MUM 19.32 /<br>CMG15T | MK986701          |
| <i>Emericellopsis pusilla</i> P.N. Mathur, Sukapure & Thirum.           | CBS 226.62T           | MH858143          |
| <i>Emericellopsis robusta</i> Emden & W. Gams                           | CBS 489.73            | AY632664          |
| <i>Emericellopsis robusta</i> Emden & W. Gams                           | CBS 105.70            | MH859510          |
| <i>Emericellopsis salmosynnemata</i> Grosklags & Swift                  | CBS 382.62            | AY632666          |
| <i>Emericellopsis stolckiae</i> D.E. Davidson & M. Chr.                 | CBS 159.71T           | NR_156197.1       |
| <i>Emericellopsis synnematicola</i> P.N. Mathur & Thirum.               | CBS 176.60T           | AY632665.1        |
| <i>Emericellopsis terricola</i> J.F.H. Beyma                            | CBS 120.40T           | U57676            |
| <i>Emericellopsis terricola</i> J.F.H. Beyma                            | CBS 229.59            | AY632662          |
| <i>Acremonium sclerotigenum</i> (Moreau & R. Moreau ex Valenta) W. Gams | CBS 124.42T           | MH856101          |
| <i>Acremonium</i> sp.                                                   | A109                  | KC987146          |

**Table S3. Antimicrobial activity of the studied strains**

| No                          | No. of Strains | Zone, mm                     |                                |                              |                                |
|-----------------------------|----------------|------------------------------|--------------------------------|------------------------------|--------------------------------|
|                             |                | Extract from culture fluid   |                                | Mycelium extract             |                                |
|                             |                | <i>A.niger</i><br>ATCC 16404 | <i>C.albicans</i><br>ATCC 2091 | <i>A.niger</i><br>ATCC 16404 | <i>C.albicans</i><br>ATCC 2091 |
| Soda soils                  |                |                              |                                |                              |                                |
| 1                           | E101 T         | 17                           | 15                             | 0                            | 0                              |
| 2                           | A112           | 15                           | 10                             | 0                            | 0                              |
| 3                           | A113           | 10                           | 20                             | 7                            | 7                              |
| 4                           | A120           | 19                           | 10                             | 10                           | 10                             |
| 5                           | A121           | 11                           | 13                             | 11                           | 0                              |
| 6                           | A123           | 19                           | 12                             | 17                           | 10                             |
| 7                           | A124           | 10                           | 11                             | 23                           | 0                              |
| 8                           | A125           | 8                            | 10                             | 20                           | 0                              |
| 9                           | A126           | 9                            | 11                             | 15                           | 0                              |
| 10                          | A127           | 0                            | 10                             | 0                            | 0                              |
| 11                          | M14            | 0                            | 9                              | 0                            | 0                              |
| 12                          | 5KS17-3        | 21                           | 21                             | 9                            | 0                              |
| 13                          | 6KS17-1        | 14                           | 28                             | 0                            | 0                              |
| 14                          | 7KS17-1        | 21                           | 12                             | 9                            | 9                              |
| 15                          | 8KS17-1        | 16                           | 28                             | 0                            | 0                              |
| 16                          | 9KS17-3        | 17                           | 15                             | 9                            | 9                              |
| 17                          | 10KS17-1       | 23                           | 21                             | 0                            | 0                              |
| 18                          | 14KS17-1       | 17                           | 18                             | 9                            | 0                              |
| 19                          | 6KS10-2        | 11                           | 14                             | 9                            | 9                              |
| Soda-chloride-sulfate soils |                |                              |                                |                              |                                |
| 1                           | A103           | 15                           | 0                              | 0                            | 0                              |
| 2                           | A116           | 10                           | 19                             | 8                            | 0                              |
| Chloride soils              |                |                              |                                |                              |                                |
| 1                           | A114           | 16                           | -                              | 0                            | 0                              |
| 2                           | A122           | 10                           | 14                             | 9                            | 0                              |
| 3                           | 3KS17-13       | 19                           | 21                             | 9                            | 0                              |
| 4                           | 1KS17-1        | 26                           | 13                             | 0                            | 0                              |
| 5                           | 1KS17-4        | 0                            | 0                              | 0                            | 0                              |
| 6                           | 2KS17-1        | 10                           | 12                             | 9                            | 9                              |
| 7                           | 3KS17-1        | 0                            | 0                              | 0                            | 0                              |
| 8                           | 3KS17-2        | 0                            | 0                              | 0                            | 0                              |
| 9                           | 3KS17-12       | 0                            | 0                              | 0                            | 0                              |
| Chloride-sulfate soils      |                |                              |                                |                              |                                |
| 1                           | A115           | 9                            | 0                              | 8                            | 0                              |
| 2                           | A117           | 21                           | 21                             | 8                            | 9                              |
| 3                           | A119           | 15                           | 12                             | 10                           | 0                              |
| Soda-chloride soils         |                |                              |                                |                              |                                |
| 1                           | A118           | 26                           | 28                             | 10                           | 10                             |

|                    |         |    |    |    |    |
|--------------------|---------|----|----|----|----|
| 2                  | M20     | 26 | 20 | 10 | 10 |
| Sulfate-soda soils |         |    |    |    |    |
| 1                  | A128    | 10 | 9  | 9  | -  |
| 2                  | M71     | 9  | 9  | 0  | 9  |
| Undefined          |         |    |    |    |    |
| 1                  | 1KS18-5 | 12 | 16 | 9  | 9  |

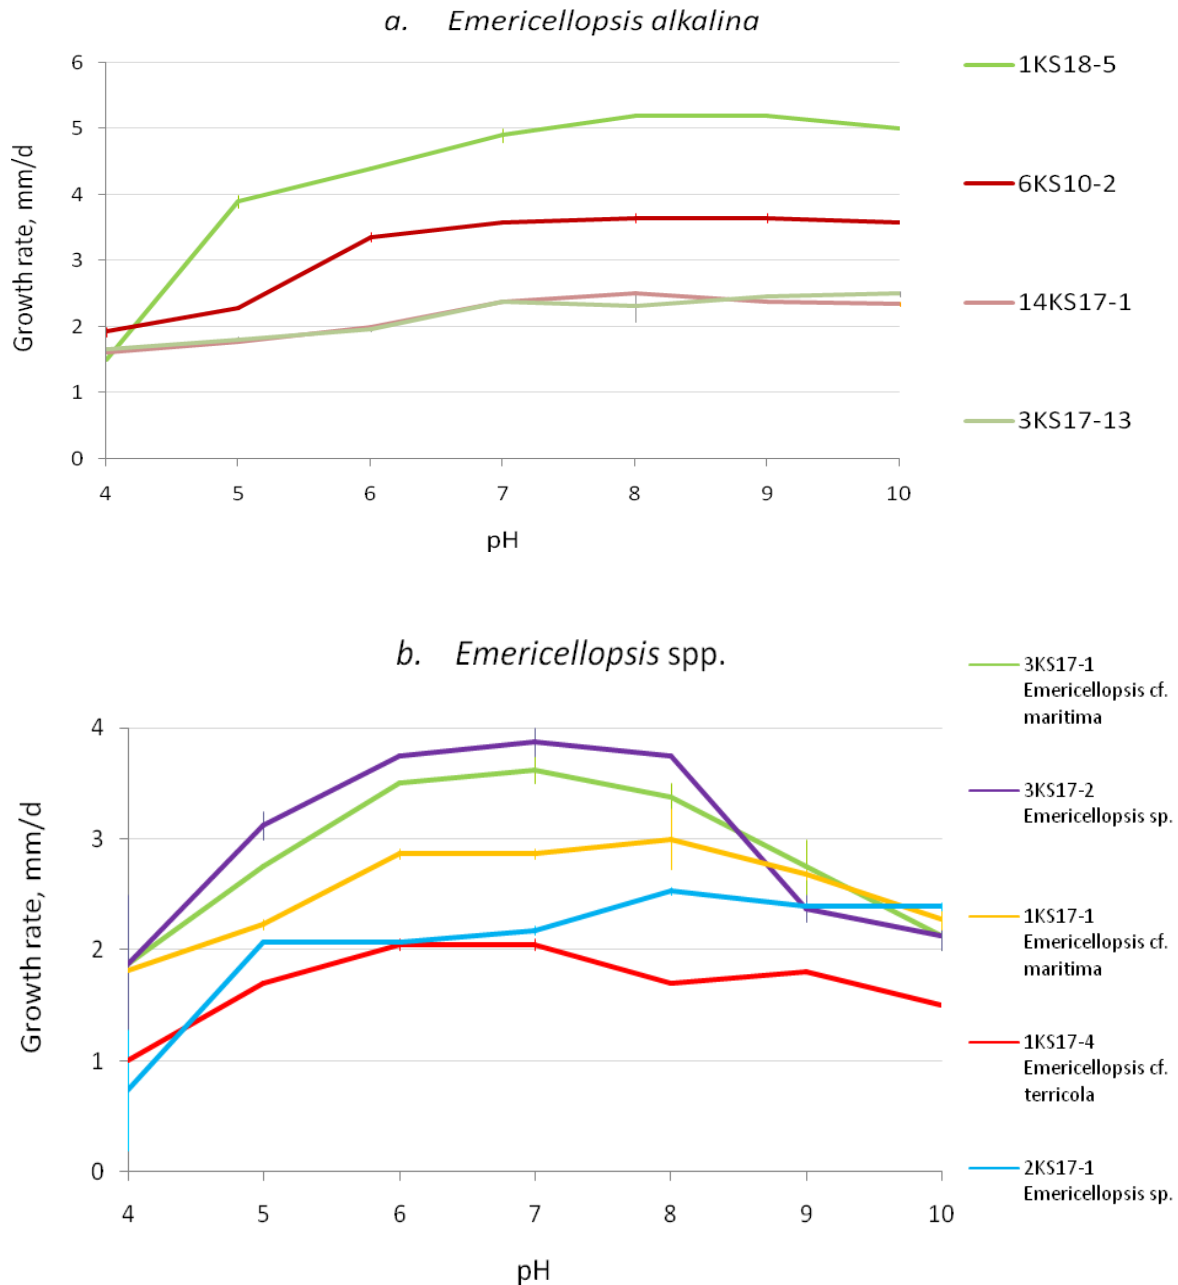

Figure S1. Growth patterns of the *Emericellopsis* strains at pH 4 through 10. Inoculation was done with a mycelium plug (1 mm) placed in the centre of a plate. The diameters of the colonies were measured every 2–4 days until they reached the edge of the plate. Growth rate was calculated as mm/day during linear growth of the fungus. Results presented on the graphs include population standard deviation. A. All *E. alkalina* strains showed good growth ability from neutral with pH 7 to alkaline medium with pH 10, had an optimum growth at pH 9. B. Other *Emericellopsis* strains showed different growth ability and the pH preferences.

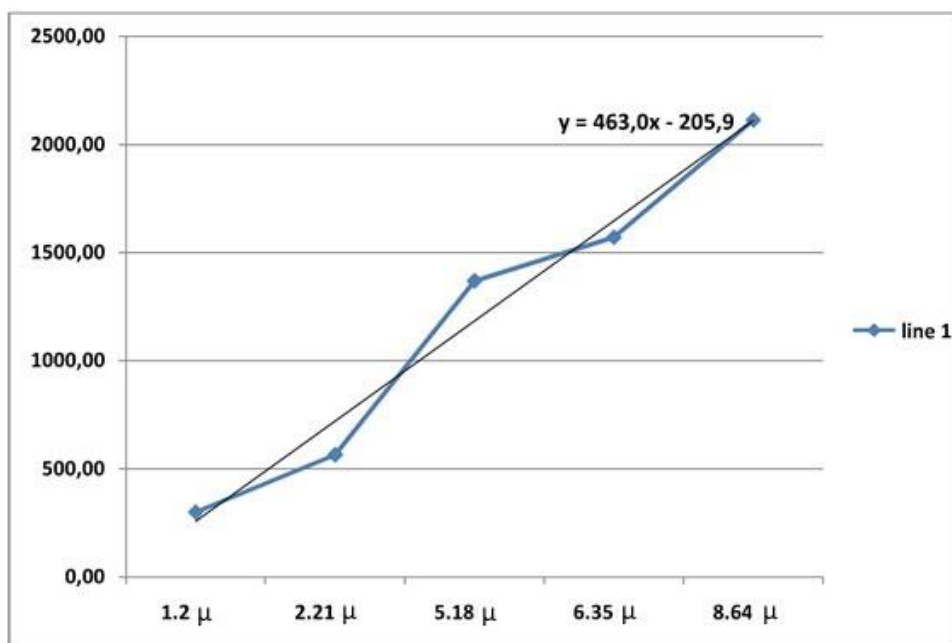

Figure S2. Emericellipsin A HPLC calibration

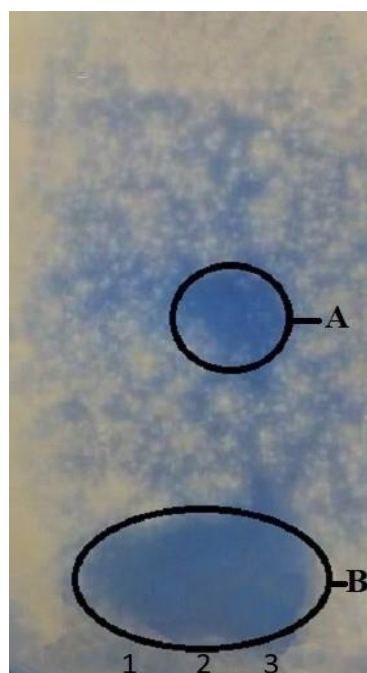

Figure S3. Bioautographic assay. Test culture is *A. niger* INA 00760, the elution system consist of CHCl<sub>3</sub> (chloroform): MeOH (metanol) 3:1 respectively. The zones of growth inhibition are marked with black ovals. Black numbers 1, 2 and 3 are the concentrations of Emericellipsin A solutions 0,25 mg/ml; 0,5 mg/ml and 1 mg/ml respectively. A and B are two zones active against strain *A. niger* INA 00760.
